# Supplementary material for: Hypothalamic overexpression of mutant huntingtin causes dysregulation of brown adipose tissue
Source: PubMed Central journal article supplement (PMC4588570; doi:10.1038/srep14598), 2015-09-30
Supplement: srep14598-s1.pdf [file srep14598-s1.pdf]

# **Hypothalamic overexpression of mutant huntingtin causes dysregulation of brown adipose tissue**

Rana Soylu-Kucharz<sup>1\*</sup>, Natalie Adlesic<sup>1</sup>, Barbara Baldo<sup>1</sup>, Deniz Kirik<sup>2</sup>, Åsa Petersén<sup>1</sup>

1. Translational Neuroendocrine Research Unit, Department of Experimental Medical Sciences, Lund University, Sweden
2. Brain Repair and Imaging in Neural Systems (B.R.A.I.N.S.) Unit, Department of Experimental Medical Sciences Lund University, Sweden

## Supplementary Statistical Results

Statistical analyses were performed using Prism 6 software (GraphPad) and  $p < 0.05$  was considered statistically significant. The data was tested for normal distribution using a Kolmogorov–Smirnov test. M: mean, SD: standard deviation.

**Figure 1G:** Stereological estimation of TH+ cells in the A13 area.

6 weeks: Unpaired t test with equal SD;  $t(10)=2.364$ ,  $p=0.0397$  (2-tailed)

rAAV5-HTT853-18Q: M=87, SD=12.12, n=6

rAAV5-HTT853-79Q: M=63.5, SD=21.12, n=6

12 weeks: Unpaired t test with equal SD;  $t(6)=2.455$ ,  $p=0.0495$  (2-tailed)

rAAV5-HTT853-18Q: M=109.3, SD=36.55, n=4

rAAV5-HTT853-79Q: M=57.25, SD=21.41, n=4

18 weeks: Unpaired t test with equal SD;  $t(6)=4.295$ ,  $p=0.0051$  (2-tailed)

rAAV5-HTT853-18Q: M=100.3, SD=5.795, n=4

rAAV5-HTT853-79Q: M=44.5, SD=25.3, n=4

**Figure 2H:** Number of TH+ cells in A13 area of the hypothalamus at 12 months post-injection.

One-way ANOVA,  $F(3, 32) = 16.64$ ,  $P < 0.0001$

Tukey's multiple comparisons test

Uninjected vs. rAAV5-GFP:  $p=0.2609$

Uninjected vs. rAAV5-HTT853-18Q:  $p=0.3862$

Uninjected vs. rAAV5-HTT853-79Q:  $p=0.0007$

rAAV5-GFP vs. rAAV5-HTT853-18Q:  $p=0.0031$

rAAV5-GFP vs. rAAV5-HTT853-79Q:  $p < 0.0001$

rAAV5-HTT853-18Q vs. rAAV5-HTT853-79Q:  $p=0.031$

**Figure 2I:** Number of TH+ cells in A14 area of the hypothalamus at 12 months post-injection.

Kruskal-Wallis test:  $p=0.0125$

Uninjected: M=2756, SD=996, n=7

rAAV5-GFP: M=4658, SD=1634, n=11

rAAV5-HTT853-18Q: M=4300, SD=1344, n=9

rAAV5-HTT853-79Q: M=2852, SD=1369, n=9

Dunn's multiple comparisons test

Uninjected vs. rAAV5-GFP:  $P=0.0716$   
Uninjected vs. rAAV5-HTT853-18Q:  $p=0.2679$   
Uninjected vs. rAAV5-HTT853-79Q:  $p > 0.9999$   
rAAV5-GFP vs. rAAV5-HTT853-18Q:  $p > 0.9999$   
rAAV5-GFP vs. rAAV5-HTT853-79Q:  $p=0.0578$   
rAAV5-HTT853-18Q vs. rAAV5-HTT853-79Q:  $p=0.2504$

**Figure 2J:** Number of TH+ cells in A12 area of the hypothalamus at 12 months post-injection.

One-way ANOVA,  $F(3, 32) = 2.780, P = 0.0569$

Tukey's multiple comparisons test

Uninjected vs. rAAV5-GFP:  $p=0.0758$   
Uninjected vs. rAAV5-HTT853-18Q:  $p=0.4135$   
Uninjected vs. rAAV5-HTT853-79Q:  $p=0.9727$   
rAAV5-GFP vs. rAAV5-HTT853-18Q:  $p=0.7737$   
rAAV5-GFP vs. rAAV5-HTT853-79Q:  $p=0.1376$   
rAAV5-HTT853-18Q vs. rAAV5-HTT853-79Q:  $p=0.6252$

**Figure 3J:** Number of orexin+ cells in the hypothalamus at 12 months post-injection.

One-way ANOVA,  $F(3, 30) = 74.63, P < 0.0001$

Tukey's multiple comparisons test

Uninjected vs. rAAV5-GFP:  $p=0.9995$   
Uninjected vs. rAAV5-HTT853-18Q:  $p=0.0006$   
Uninjected vs. rAAV5-HTT853-79Q:  $p < 0.0001$   
rAAV5-GFP vs. rAAV5-HTT853-18Q:  $p=0.0004$   
rAAV5-GFP vs. rAAV5-HTT853-79Q:  $p < 0.0001$   
rAAV5-HTT853-18Q vs. rAAV5-HTT853-79Q:  $p < 0.0001$

**Figure 3K:** Body weight changes over 12 months.

Two-way ANOVA; Vector:  $F(3, 345) = 145.5, P < 0.0001$   
Time:  $F(4, 345) = 114.2, P < 0.0001$   
Vector\*Time:  $F(12, 345) = 12.12, P < 0.0001$

Tukey's multiple comparisons test

0 months post-injection

Uninjected vs. rAAV5-GFP:  $p=0.9998$   
Uninjected vs. rAAV5-HTT853-18Q:  $p> 0.9999$   
Uninjected vs. rAAV5-HTT853-79Q:  $p=0.9658$   
AAV5-GFP vs. rAAV5-HTT853-18Q:  $p=0.9998$   
AAV5-GFP vs. rAAV5-HTT853-79Q:  $p=0.9472$   
rAAV5-HTT853-18Q vs. rAAV5-HTT853-79Q:  $p=0.9665$

#### 3 months post-injection

Uninjected vs. rAAV5-GFP:  $p=0.9956$   
Uninjected vs. rAAV5-HTT853-18Q:  $p=0.7224$   
Uninjected vs. rAAV5-HTT853-79Q:  $p < 0.0001$   
rAAV5-GFP vs. rAAV5-HTT853-18Q:  $p=0.581$   
rAAV5-GFP vs. rAAV5-HTT853-79Q:  $p < 0.0001$   
rAAV5-HTT853-18Q vs. rAAV5-HTT853-79Q:  $p < 0.0001$

#### 6 months post-injection

Uninjected vs. rAAV5-GFP:  $p=0.9974$   
Uninjected vs. rAAV5-HTT853-18Q:  $p=0.3157$   
Uninjected vs. rAAV5-HTT853-79Q:  $p < 0.0001$   
rAAV5-GFP vs. rAAV5-HTT853-18Q:  $p=0.4189$   
rAAV5-GFP vs. rAAV5-HTT853-79Q:  $p < 0.0001$   
rAAV5-HTT853-18Q vs. rAAV5-HTT853-79Q:  $p < 0.0001$

#### 9 months post-injection

Uninjected vs. rAAV5-GFP:  $p=0.6717$   
Uninjected vs. rAAV5-HTT853-18Q:  $p=0.0504$   
Uninjected vs. rAAV5-HTT853-79Q:  $p < 0.0001$   
rAAV5-GFP vs. rAAV5-HTT853-18Q:  $p=0.0021$   
rAAV5-GFP vs. rAAV5-HTT853-79Q:  $p < 0.0001$   
rAAV5-HTT853-18Q vs. rAAV5-HTT853-79Q:  $p < 0.0001$

#### 12 months post-injection

Uninjected vs. rAAV5-GFP:  $p=0.5742$   
Uninjected vs. rAAV5-HTT853-18Q:  $p=0.0013$   
Uninjected vs. rAAV5-HTT853-79Q:  $p < 0.0001$   
rAAV5-GFP vs. rAAV5-HTT853-18Q:  $p < 0.0001$   
rAAV5-GFP vs. rAAV5-HTT853-79Q:  $p < 0.0001$   
rAAV5-HTT853-18Q vs. rAAV5-HTT853-79Q:  $p=0.3096$

#### Tukey's multiple comparisons test

rAAV5-HTT853-79Q @6 months vs rAAV5-HTT853-79Q @12 months:  
 $p=0.005$

**Figure 3K:** DEXA scan measurement at 12 months post-injection.

One-way ANOVA,  $F(3, 57) = 15.66, P < 0.0001$

Tukey's multiple comparisons test

Control vs. rAAV5-GFP:  $p=0.8945$

Control vs. rAAV5-HTT853-18Q:  $p=0.0046$

Control vs. rAAV5-HTT853-79Q:  $p < 0.0001$

rAAV5-GFP vs. rAAV5-HTT853-18Q:  $p=0.0005$

rAAV5-GFP vs. rAAV5-HTT853-79Q:  $p < 0.0001$

rAAV5-HTT853-18Q vs. rAAV5-HTT853-79Q:  $p=0.7836$

**Figure 3M:** Serum leptin measurement at 12 months post-injection.

One-way ANOVA,  $F(3, 35) = 20.59, P < 0.0001$

Tukey's multiple comparisons test

Uninjected vs. rAAV5-GFP:  $p=0.8973$

Uninjected vs. rAAV5-HTT853-18Q:  $p=0.0004$

Uninjected vs. rAAV5-HTT853-79Q:  $p < 0.0001$

rAAV5-GFP vs. rAAV5-HTT853-18Q:  $p < 0.0001$

rAAV5-GFP vs. rAAV5-HTT853-79Q:  $p < 0.0001$

rAAV5-HTT853-18Q vs. rAAV5-HTT853-79Q:  $p=0.7414$

**Figure 3N:** Serum insulin measurement at 12 months post-injection.

One-way ANOVA,  $F(3, 35) = 14.07, P < 0.0001$

Tukey's multiple comparisons test

Uninjected vs. rAAV5-GFP:  $p=0.9998$

Uninjected vs. rAAV5-HTT853-18Q:  $p=0.9205$

Uninjected vs. rAAV5-HTT853-79Q:  $p < 0.0001$

rAAV5-GFP vs. rAAV5-HTT853-18Q:  $p=0.9442$

rAAV5-GFP vs. rAAV5-HTT853-79Q:  $p < 0.0001$

rAAV5-HTT853-18Q vs. rAAV5-HTT853-79Q:  $p=0.0002$

**Figure 3O:** Serum IGF-1 measurement at 12 months post-injection.

One-way ANOVA,  $F(3, 35) = 4.112, P = 0.0134$

Tukey's multiple comparisons test

Uninjected vs. rAAV5-GFP:  $p=0.6479$

Uninjected vs. rAAV5-HTT853-18Q:  $p=0.2395$

Uninjected vs. rAAV5-HTT853-79Q:  $p=0.3962$

rAAV5-GFP vs. rAAV5-HTT853-18Q:  $p=0.0211$

rAAV5-GFP vs. rAAV5-HTT853-79Q:  $p=0.0428$

rAAV5-HTT853-18Q vs. rAAV5-HTT853-79Q:  $p=0.9828$

**Figure 4A:** Gene expression analysis of the hypothalamus at 8 weeks post-injection.

Y1: One-way ANOVA,  $F(2, 18) = 10.31, P = 0.0010$

Tukey's multiple comparisons test

Uninjected vs. rAAV5-HTT853-18Q:  $p=0.5429$

Uninjected vs. rAAV5-HTT853-79Q:  $p=0.0011$

rAAV5-HTT853-18Q vs. rAAV5-HTT853-79Q:  $p=0.0109$

TH: One-way ANOVA,  $F(2, 18) = 9.642, P = 0.0014$

Tukey's multiple comparisons test

Uninjected vs. rAAV5-HTT853-18Q:  $p=0.3029$

Uninjected vs. rAAV5-HTT853-79Q:  $p=0.0011$

rAAV5-HTT853-18Q vs. rAAV5-HTT853-79Q:  $p=0.0301$

NPY: One-way ANOVA,  $F(2, 18) = 5.114, P = 0.0174$

Tukey's multiple comparisons test

Uninjected vs. rAAV5-HTT853-18Q:  $p=0.1463$

Uninjected vs. rAAV5-HTT853-79Q:  $p=0.0141$

rAAV5-HTT853-18Q vs. rAAV5-HTT853-79Q:  $p=0.4757$

**Figure 4B:** HTT expression in the hypothalamus at 8 weeks post-injection.

Unpaired t test;  $t(12)=0.3891, p=0.704$  (2-tailed)

rAAV5-HTT853-18Q:  $M=1, SD=0.2818, n=7$

rAAV5-HTT853-79Q:  $M=1.044, SD=0.106, n=7$

**Figure 4F:** Gene expression analysis of the BAT at 18 weeks post-injection in animals injected with AAV5-HTT853-18Q or AAV-HTT853-79Q vectors in the hypothalamus.

UCP1: Kruskal-Wallis test,  $p=0.0004$

Uninjected:  $M=1, SD=0.257, n=6$

rAAV5-HTT853-18Q:  $M=1.042, SD=0.05707, n=6$

rAAV5-HTT853-79Q:  $M=0.475, SD=0.1557, n=6$

Dunn's multiple comparisons test

Uninjected vs. rAAV5-HTT853-18Q:  $p > 0.9999$

Uninjected vs. rAAV5-HTT853-79Q:  $p=0.0205$   
rAAV5-HTT853-18Q vs. rAAV5-HTT853-79Q:  $p=0.0051$

GLUT4: Kruskal-Wallis test,  $p=0.0088$

Uninjected:  $M=0.9983$ ,  $SD=0.1158$ ,  $n=6$   
rAAV5-HTT853-18Q:  $M=0.9233$ ,  $SD=0.3336$ ,  $n=6$   
rAAV5-HTT853-79Q:  $M=0.5767$ ,  $SD=0.2117$ ,  $n=6$

Dunn's multiple comparisons test

Uninjected vs. rAAV5-HTT853-18Q:  $p=0.7985$   
Uninjected vs. rAAV5-HTT853-79Q:  $p=0.0121$   
rAAV5-HTT853-18Q vs. rAAV5-HTT853-79Q:  $p=0.2338$

PGC-1 $\alpha$ : Kruskal-Wallis test,  $p=0.0005$

Uninjected:  $M=1$ ,  $SD=0.1399$ ,  $n=6$   
rAAV5-HTT853-18Q:  $M=1.093$ ,  $SD=0.2705$ ,  $n=6$   
rAAV5-HTT853-79Q:  $M=0.945$ ,  $SD=0.2107$ ,  $n=6$

Dunn's multiple comparisons test

Uninjected vs. rAAV5-HTT853-18Q:  $p > 0.9999$   
Uninjected vs. rAAV5-HTT853-79Q:  $p=0.0161$   
rAAV5-HTT853-18Q vs. rAAV5-HTT853-79Q:  $p=0.0067$

PPAR $\gamma$ : Kruskal-Wallis test,  $p=2736$

Uninjected:  $M=1$ ,  $SD=0.1399$ ,  $n=6$   
rAAV5-HTT853-18Q:  $M=1.093$ ,  $SD=0.2705$ ,  $n=6$   
rAAV5-HTT853-79Q:  $M=0.945$ ,  $SD=0.2107$ ,  $n=6$

Dunn's multiple comparisons test

Uninjected vs. rAAV5-HTT853-18Q:  $p > 0.9999$   
Uninjected vs. rAAV5-HTT853-79Q:  $p=0.7004$   
rAAV5-HTT853-18Q vs. rAAV5-HTT853-79Q:  $p=0.3488$

ARDB3: Kruskal-Wallis test,  $p=0.1425$

Uninjected:  $M=1.002$ ,  $SD=0.4014$ ,  $n=6$   
rAAV5-HTT853-18Q:  $M=0.8367$ ,  $SD=0.2384$ ,  $n=6$   
rAAV5-HTT853-79Q:  $M=0.59$ ,  $SD=0.264$ ,  $n=6$

Dunn's multiple comparisons test

Uninjected vs. rAAV5-HTT853-18Q:  $p > 0.9999$   
Uninjected vs. rAAV5-HTT853-79Q:  $p=0.1439$   
rAAV5-HTT853-18Q vs. rAAV5-HTT853-79Q:  $p=0.9097$
